# Supplementary material
Source: Springer Nature journal article supplement (https://www.springermedizin.de/resource/supplementary/12936_2007_418_MOESM1_ESM.pdf/9547404)
Supplement: MOESM1 [file 9547404]

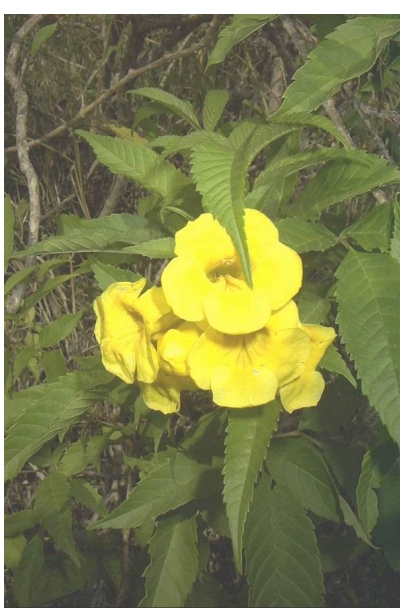

*Tecoma stans* L.

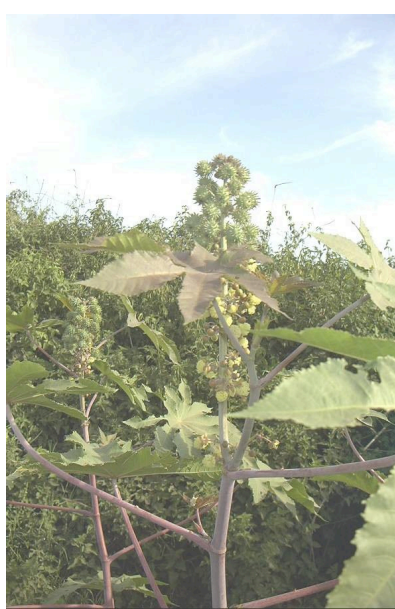

*Ricinus communis* L.

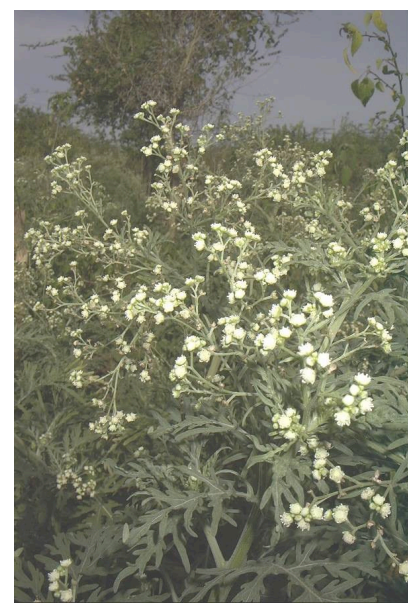

*Parthenium hysterophorus* L.

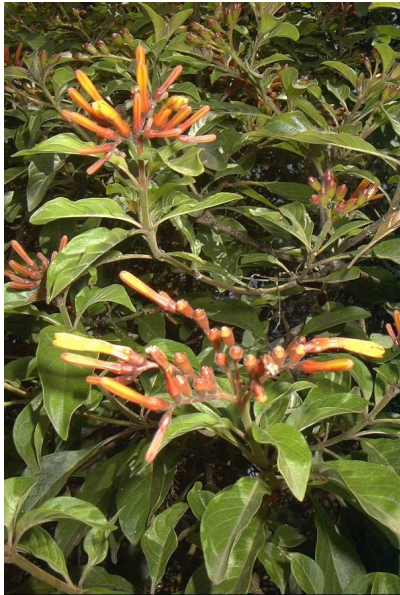

*Hamelia patens* Jacq

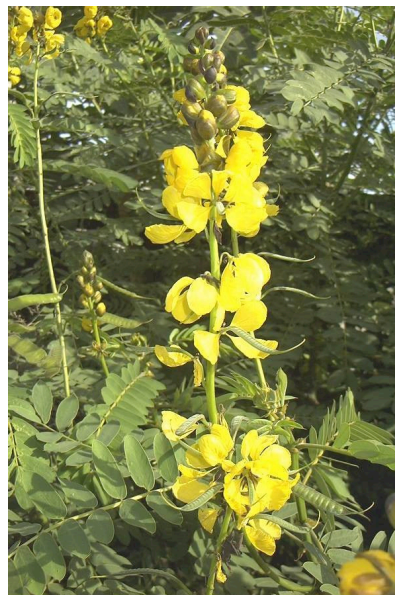

*Senna didymobotrya* Fresen

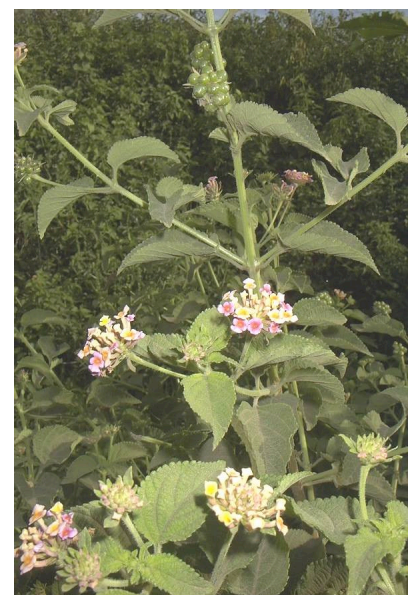

*Lantana camara* L.
